# Supplementary material for: How are the ready and unready states of nickel–iron hydrogenase activated by H2? A density functional theory study
Source: Royal Society of Chemistry journal article supplement (doi:10.1039/b608069c), 2006-01-01
Supplement: b608069c.pdf [file b608069c.pdf]

# **How are the Ready and Unready states of Nickel-Iron Hydrogenase activated by H<sub>2</sub>? A density functional theory study.**

**Prabha Jayapal, Mahesh Sundararajan, Ian H Hillier\* and Neil A Burton**

**Supplementary Information**

Optimized Cartesian coordinates (Å) for all species studied in this paper and their absolute energies (Hartree) with Zero point correction. Imaginary frequencies ( $\text{cm}^{-1}$ ) for the transition states are given in parentheses.

**1. -4899.432678**

|    |           |           |           |
|----|-----------|-----------|-----------|
| H  | 2.149108  | -4.311625 | -1.017135 |
| H  | 2.248211  | 2.484738  | 2.587157  |
| H  | 2.666095  | 1.551289  | -2.438518 |
| H  | 2.481435  | 1.745526  | -0.663275 |
| C  | 1.531645  | -3.397125 | -0.923310 |
| S  | 2.036853  | -2.532477 | 0.625454  |
| H  | 1.332867  | 2.587861  | -1.781738 |
| H  | -1.575914 | -2.416974 | 2.257194  |
| H  | 0.464177  | -3.676063 | -0.904863 |
| H  | 1.709556  | -2.751870 | -1.800725 |
| C  | -1.912911 | -1.510651 | 1.724342  |
| S  | -1.134724 | -1.483380 | 0.056897  |
| H  | -3.008648 | -1.504991 | 1.605606  |
| H  | -1.615967 | -0.602253 | 2.271157  |
| H  | 0.288764  | 1.755010  | 0.932175  |
| C  | 2.061087  | 1.463854  | 2.970738  |
| S  | 2.712879  | 0.160239  | 1.830250  |
| C  | 1.935740  | 1.679473  | -1.619187 |
| S  | 0.836928  | 0.195842  | -1.586881 |
| Fe | -1.302305 | 0.746506  | -0.671687 |
| C  | -1.112641 | 2.599051  | -1.018760 |
| N  | -0.918351 | 3.760142  | -1.214898 |
| C  | -2.954909 | 1.030392  | 0.224471  |
| N  | -4.001655 | 1.172301  | 0.777419  |
| C  | -2.139780 | 0.483610  | -2.150233 |
| O  | -2.721698 | 0.315275  | -3.173619 |
| Ni | 0.912439  | -0.608225 | 0.680533  |
| O  | -0.229012 | 0.933908  | 1.086531  |
| H  | 0.973799  | 1.339653  | 3.109530  |
| H  | 2.563497  | 1.365063  | 3.951520  |

**2. -4900.596435**

|    |           |           |           |
|----|-----------|-----------|-----------|
| C  | -2.540532 | 2.507453  | 1.340125  |
| Fe | -0.757298 | 1.915536  | 1.584743  |
| C  | -0.117715 | 3.705500  | 1.618513  |
| N  | 0.313613  | 4.816169  | 1.661515  |
| N  | -3.670866 | 2.825220  | 1.126551  |
| C  | -0.909929 | 1.930292  | 3.297787  |
| O  | -1.024604 | 1.948180  | 4.481151  |
| O  | -0.488246 | 1.776814  | -0.459221 |
| Ni | 0.309316  | -0.011610 | -0.337890 |
| S  | -0.394648 | -0.688180 | -2.394706 |

|   |           |           |           |
|---|-----------|-----------|-----------|
| C | -0.864679 | 0.856111  | -3.298596 |
| S | -1.330263 | -0.396446 | 1.382318  |
| C | -2.932890 | -0.605622 | 0.487971  |
| S | 1.401972  | 1.006433  | 1.421570  |
| C | 2.378032  | 2.224640  | 0.446434  |
| S | 1.582082  | -1.839825 | -0.400432 |
| C | 1.820877  | -2.379571 | 1.346178  |
| H | -1.957943 | 1.024715  | -3.287483 |
| H | -0.373102 | 1.730607  | -2.839991 |
| H | -0.537793 | 0.769426  | -4.351820 |
| H | 2.418813  | -1.650926 | 1.919809  |
| H | 0.845393  | -2.503280 | 1.846845  |
| H | 2.345019  | -3.354812 | 1.330300  |
| H | 2.631601  | 3.077122  | 1.097296  |
| H | 3.288448  | 1.727130  | 0.069170  |
| H | 1.761867  | 2.593839  | -0.388008 |
| H | -2.724058 | -0.799905 | -0.577268 |
| H | -3.458047 | -1.477781 | 0.917814  |
| H | -3.549349 | 0.300796  | 0.604476  |
| H | 1.544302  | -1.248586 | -4.496876 |
| H | -1.408363 | 1.684139  | -0.791628 |
| H | 1.923587  | -1.325974 | -5.147362 |

**3. -4900.572388 (177.23i)**

|    |           |           |           |
|----|-----------|-----------|-----------|
| C  | -2.530975 | 3.132596  | 1.916394  |
| Fe | -1.007573 | 2.006229  | 1.672734  |
| S  | 0.810945  | 0.544228  | 1.337885  |
| C  | 2.081085  | 1.550772  | 0.468661  |
| N  | -3.499384 | 3.808797  | 2.069469  |
| C  | 0.136167  | 3.424603  | 2.246654  |
| N  | 0.889728  | 4.302084  | 2.535766  |
| C  | -1.241531 | 1.377509  | 3.281176  |
| O  | -1.414626 | 0.976543  | 4.382962  |
| O  | -0.862020 | 2.730767  | -0.168111 |
| Ni | -0.268785 | -0.619197 | -0.289459 |
| S  | -1.508932 | -1.804005 | -1.811103 |
| C  | -0.636160 | -1.469850 | -3.398750 |
| S  | -2.169746 | 0.204749  | 0.727005  |
| C  | -3.238447 | 0.981044  | -0.551139 |
| S  | 1.228072  | -2.246661 | -0.543395 |
| C  | 2.833091  | -1.915671 | 0.317829  |
| H  | -0.673371 | -0.397177 | -3.663975 |
| H  | 0.420152  | -1.786406 | -3.334387 |
| H  | -1.135719 | -2.047951 | -4.200572 |
| H  | 3.516309  | -1.307678 | -0.304299 |
| H  | 2.670896  | -1.396208 | 1.278313  |
| H  | 3.321986  | -2.888318 | 0.515534  |
| H  | 2.561662  | 2.198284  | 1.220188  |
| H  | 2.822672  | 0.888849  | -0.008627 |

|   |           |          |           |
|---|-----------|----------|-----------|
| H | 1.583917  | 2.186045 | -0.281398 |
| H | -3.424587 | 0.240177 | -1.345843 |
| H | -4.174525 | 1.286160 | -0.053099 |
| H | -2.718950 | 1.875298 | -0.933203 |
| H | -0.096098 | 0.792399 | -1.559435 |
| H | -0.418464 | 3.600255 | -0.061192 |
| H | -0.295351 | 1.480291 | -1.176571 |

**4. -4900.590293**

|    |           |           |           |
|----|-----------|-----------|-----------|
| C  | -2.361886 | 2.451043  | 2.013796  |
| N  | -3.453593 | 2.819083  | 2.318343  |
| Fe | -0.632150 | 1.824377  | 1.517053  |
| S  | -1.432080 | -0.241343 | 0.759741  |
| C  | -2.934126 | 0.123265  | -0.237067 |
| S  | 1.417165  | 0.875431  | 0.765416  |
| Ni | 0.412927  | -0.480523 | -0.791616 |
| S  | 1.337249  | -2.441044 | -0.091667 |
| C  | 1.336385  | -2.410497 | 1.749533  |
| C  | 0.165311  | 3.524224  | 1.841445  |
| N  | 0.697159  | 4.591484  | 1.898519  |
| C  | -0.372489 | 1.301057  | 3.124234  |
| O  | -0.204440 | 0.969736  | 4.251348  |
| O  | -0.985940 | 2.586866  | -0.447884 |
| C  | 2.406784  | 2.150180  | -0.129747 |
| S  | -0.208406 | -1.550834 | -2.655702 |
| C  | -0.702972 | -0.311615 | -3.938719 |
| H  | -1.537813 | 0.318781  | -3.585705 |
| H  | 0.135715  | 0.349281  | -4.221039 |
| H  | -1.036847 | -0.859351 | -4.841832 |
| H  | 1.814732  | -3.337109 | 2.121214  |
| H  | 1.893394  | -1.540014 | 2.138267  |
| H  | 0.304144  | -2.364965 | 2.139478  |
| H  | 2.637102  | 2.971619  | 0.568504  |
| H  | 3.336552  | 1.677152  | -0.490192 |
| H  | 1.863130  | 2.554974  | -0.999959 |
| H  | -3.184415 | -0.779398 | -0.819417 |
| H  | -3.754099 | 0.394992  | 0.448204  |
| H  | -2.754864 | 0.968192  | -0.919972 |
| H  | 0.101247  | 0.748172  | -1.610420 |
| H  | -0.384865 | 3.365415  | -0.378887 |
| H  | -0.485957 | 1.871359  | -0.978443 |

**5. -4900.622597**

|    |           |          |          |
|----|-----------|----------|----------|
| C  | 9.235073  | 5.241452 | 3.981318 |
| Fe | 7.548785  | 5.809781 | 3.333413 |
| O  | 6.793663  | 5.388638 | 5.367083 |
| N  | 10.274332 | 4.839685 | 4.398747 |
| S  | 6.878916  | 3.664880 | 2.683524 |

|    |          |          |          |
|----|----------|----------|----------|
| Ni | 4.769563 | 4.181082 | 3.372797 |
| S  | 4.287040 | 2.047216 | 3.766110 |
| C  | 3.678520 | 1.576836 | 2.085835 |
| S  | 5.360746 | 6.169957 | 2.580788 |
| C  | 4.578677 | 7.611079 | 3.441119 |
| C  | 7.795672 | 7.543033 | 4.035771 |
| N  | 7.839891 | 8.591637 | 4.601160 |
| C  | 8.269782 | 6.235435 | 1.840945 |
| O  | 8.783890 | 6.540353 | 0.822405 |
| C  | 7.605201 | 2.523181 | 3.941738 |
| S  | 2.786374 | 4.779627 | 4.219906 |
| C  | 1.829823 | 5.561520 | 2.847953 |
| H  | 2.954054 | 2.326813 | 1.736098 |
| H  | 4.558124 | 1.580840 | 1.426412 |
| H  | 3.227877 | 0.571760 | 2.116218 |
| H  | 2.342704 | 6.453843 | 2.455467 |
| H  | 1.665377 | 4.857410 | 2.015790 |
| H  | 0.847716 | 5.863621 | 3.252262 |
| H  | 4.055952 | 8.221250 | 2.686121 |
| H  | 3.857146 | 7.251751 | 4.194593 |
| H  | 5.375008 | 8.210104 | 3.910740 |
| H  | 7.239724 | 1.496809 | 3.772697 |
| H  | 8.698165 | 2.568642 | 3.819267 |
| H  | 7.352985 | 2.863152 | 4.956831 |
| H  | 7.208912 | 6.189600 | 5.771723 |
| H  | 5.832610 | 5.602975 | 5.282368 |
| H  | 3.035894 | 2.278235 | 4.301284 |

**6. -4900.582916 (-74.96i)**

|    |           |           |           |
|----|-----------|-----------|-----------|
| C  | -2.308604 | 2.379688  | 1.949262  |
| Fe | -0.570684 | 1.707791  | 1.558689  |
| O  | -1.288436 | 3.367193  | -0.581392 |
| N  | -3.402807 | 2.837082  | 2.088652  |
| S  | -1.419146 | -0.322324 | 0.805944  |
| Ni | 0.377878  | -0.620386 | -0.687320 |
| S  | -0.052619 | -1.549655 | -2.663957 |
| C  | -0.568449 | -0.252350 | -3.879162 |
| S  | 1.430861  | 0.837115  | 0.740058  |
| C  | 2.181463  | 2.172344  | -0.292155 |
| C  | 0.215089  | 3.409137  | 1.900918  |
| N  | 0.684127  | 4.501625  | 2.012810  |
| C  | -0.333652 | 1.196969  | 3.153735  |
| O  | -0.177963 | 0.866977  | 4.283583  |
| C  | -2.851672 | 0.115413  | -0.267027 |
| S  | 1.309351  | -2.581208 | 0.075602  |
| C  | 1.349870  | -2.433104 | 1.912279  |
| H  | -1.466113 | 0.288516  | -3.532858 |
| H  | 0.232167  | 0.488536  | -4.049218 |
| H  | -0.803979 | -0.744569 | -4.843249 |

|   |           |           |           |
|---|-----------|-----------|-----------|
| H | 1.836036  | -3.329787 | 2.343249  |
| H | 1.916729  | -1.539375 | 2.229579  |
| H | 0.328126  | -2.356993 | 2.326139  |
| H | 2.517255  | 2.992574  | 0.363231  |
| H | 3.038977  | 1.736329  | -0.833371 |
| H | 1.447566  | 2.552539  | -1.019254 |
| H | -3.162440 | -0.801538 | -0.795795 |
| H | -3.673833 | 0.508090  | 0.353653  |
| H | -2.546399 | 0.872482  | -1.006606 |
| H | -0.048543 | 0.593160  | -1.395756 |
| H | -2.072753 | 3.289590  | 0.015979  |
| H | -0.655284 | 3.876200  | -0.017822 |

### 7. -4900.618372

|    |           |           |           |
|----|-----------|-----------|-----------|
| C  | -2.434304 | 1.449059  | 0.298498  |
| Fe | -0.612001 | 1.198936  | 0.750070  |
| C  | -0.218392 | 2.481120  | -0.583569 |
| N  | -0.029783 | 3.304722  | -1.426693 |
| N  | -3.567707 | 1.651321  | -0.015406 |
| C  | -0.667837 | 2.405563  | 1.993326  |
| O  | -0.706258 | 3.225863  | 2.851203  |
| S  | -0.975759 | -0.720771 | 1.958511  |
| Ni | 0.181105  | -1.155831 | 0.042719  |
| S  | 0.363313  | -1.661552 | -2.114619 |
| C  | -0.570268 | -0.406174 | -3.103954 |
| S  | 1.597328  | 0.497515  | 0.978644  |
| C  | 2.579640  | 1.106595  | -0.457365 |
| C  | -2.640375 | -1.406564 | 1.560101  |
| S  | 0.975541  | -3.185770 | 0.565746  |
| C  | 1.717756  | -3.029350 | 2.247582  |
| O  | -3.028220 | 3.947238  | -2.082788 |
| H  | -1.648812 | -0.438817 | -2.880819 |
| H  | -0.211954 | 0.615143  | -2.898409 |
| H  | -0.417065 | -0.635190 | -4.175666 |
| H  | 2.133201  | -4.015110 | 2.534362  |
| H  | 2.530252  | -2.282903 | 2.251858  |
| H  | 0.963974  | -2.723808 | 2.993268  |
| H  | 3.623571  | 0.769139  | -0.327439 |
| H  | 2.167063  | 0.685294  | -1.385821 |
| H  | 2.530503  | 2.205932  | -0.504363 |
| H  | -2.633435 | -2.482720 | 1.803506  |
| H  | -3.402817 | -0.880065 | 2.158662  |
| H  | -2.863249 | -1.254720 | 0.494472  |
| H  | -0.627761 | 0.097818  | -0.545033 |
| H  | -2.047914 | 3.853804  | -1.986442 |
| H  | -3.348099 | 3.249782  | -1.457950 |

### 8. -4824.178135

|    |           |           |           |
|----|-----------|-----------|-----------|
| C  | -2.422871 | 1.413617  | 0.326986  |
| N  | -1.309757 | 1.161958  | 0.672642  |
| Fe | -4.213679 | 1.763991  | -0.215003 |
| S  | -6.456864 | 2.378644  | -0.395017 |
| C  | -6.580217 | 4.143594  | -0.914257 |
| C  | -3.612111 | 3.280454  | -1.190606 |
| N  | -3.257880 | 4.229185  | -1.820661 |
| C  | -4.058569 | 0.746970  | -1.605236 |
| O  | -3.953106 | 0.044448  | -2.559233 |
| S  | -5.114121 | 0.331036  | 1.341952  |
| C  | -3.866734 | -0.066264 | 2.641034  |
| Ni | -5.629827 | 2.498670  | 1.823455  |
| S  | -7.325027 | 2.151924  | 3.254257  |
| C  | -8.452817 | 0.943901  | 2.433298  |
| S  | -5.261434 | 4.484731  | 2.763235  |
| C  | -3.621782 | 5.120233  | 2.182803  |
| H  | -2.796428 | 4.478837  | 2.532892  |
| H  | -3.575768 | 5.161436  | 1.082497  |
| H  | -3.485595 | 6.139641  | 2.592524  |
| H  | -9.301801 | 0.742174  | 3.115757  |
| H  | -8.843517 | 1.351637  | 1.485234  |
| H  | -7.933402 | -0.004489 | 2.212429  |
| H  | -7.650811 | 4.394897  | -1.023442 |
| H  | -6.125309 | 4.780651  | -0.141264 |
| H  | -6.042765 | 4.291846  | -1.864040 |
| H  | -4.408099 | -0.392347 | 3.545754  |
| H  | -3.203852 | -0.867941 | 2.274313  |
| H  | -3.253743 | 0.820843  | 2.853582  |
| H  | -4.233167 | 2.831523  | 1.114759  |

### 9. -4899.986052

|    |           |           |           |
|----|-----------|-----------|-----------|
| C  | 1.849480  | -3.315812 | -0.712786 |
| S  | 1.608153  | -2.881087 | 1.065683  |
| Ni | 0.729070  | -0.812719 | 0.923365  |
| O  | -0.226605 | 0.862698  | 1.158132  |
| Fe | -1.341102 | 0.767696  | -0.603748 |
| C  | -2.197748 | 0.623228  | -2.082707 |
| O  | -2.800557 | 0.538681  | -3.106469 |
| S  | -1.190812 | -1.473931 | 0.019922  |
| C  | -2.184220 | -1.674192 | 1.560504  |
| S  | 0.738819  | 0.273578  | -1.804014 |
| C  | 1.796193  | 1.786447  | -1.779705 |
| C  | -1.100821 | 2.636561  | -0.830732 |
| N  | -0.877251 | 3.806432  | -0.919065 |
| C  | -2.952585 | 1.074960  | 0.363901  |
| N  | -3.970955 | 1.245617  | 0.962192  |
| S  | 2.646274  | -0.157581 | 1.824548  |
| C  | 2.421285  | 1.501961  | 2.643188  |

|   |           |           |           |
|---|-----------|-----------|-----------|
| H | 2.493295  | -4.214467 | -0.780889 |
| H | 2.589815  | 2.267719  | 1.869879  |
| H | 2.670045  | 1.616522  | -2.437858 |
| H | 2.177957  | 2.015521  | -0.764402 |
| H | 1.232583  | 2.667375  | -2.128629 |
| H | -1.867334 | -2.605947 | 2.061378  |
| H | 0.874510  | -3.523934 | -1.185338 |
| H | 2.316978  | -2.475055 | -1.251478 |
| H | -3.253037 | -1.715345 | 1.290607  |
| H | -2.026103 | -0.801155 | 2.210983  |
| H | 0.330044  | 1.630308  | 0.898050  |
| H | 1.388826  | 1.591265  | 3.016403  |
| H | 3.160155  | 1.637443  | 3.452240  |
| H | 2.565430  | -0.873625 | 2.986657  |

**10. -4974.592576**

|    |           |           |           |
|----|-----------|-----------|-----------|
| S  | -1.534447 | 2.058873  | 1.115818  |
| S  | 1.236949  | 1.412046  | -0.653298 |
| S  | -1.324498 | -0.596661 | 2.495620  |
| S  | -0.729020 | -0.817960 | -1.275531 |
| Fe | 1.621047  | -0.832342 | -1.285738 |
| C  | 1.734664  | -2.703932 | -1.612463 |
| N  | 1.787578  | -3.871757 | -1.844078 |
| C  | 3.485431  | -0.728959 | -0.980261 |
| N  | 4.639533  | -0.632810 | -0.686596 |
| C  | 1.817743  | -0.513897 | -2.963499 |
| O  | 1.963100  | -0.294266 | -4.122085 |
| Ni | -0.163970 | 0.304603  | 0.787984  |
| O  | 1.180601  | -1.142994 | 0.722247  |
| O  | 2.313799  | -0.936717 | 1.666594  |
| H  | 3.066775  | -0.908215 | 1.012420  |
| C  | -1.281043 | -2.496746 | -0.762590 |
| H  | -2.342088 | -2.437202 | -0.467160 |
| H  | -1.140925 | -3.192411 | -1.605859 |
| H  | -0.675623 | -2.845044 | 0.085588  |
| C  | -0.277446 | -1.955457 | 3.174883  |
| H  | 0.476864  | -1.571534 | 3.883137  |
| H  | -0.935875 | -2.675795 | 3.697134  |
| H  | 0.255620  | -2.466893 | 2.357564  |
| C  | -1.885655 | 2.762967  | -0.552137 |
| H  | -0.971061 | 3.150231  | -1.033065 |
| H  | -2.329147 | 1.997203  | -1.211601 |
| H  | -2.611454 | 3.589527  | -0.424380 |
| C  | 2.550845  | 2.000679  | 0.496665  |
| H  | 3.530115  | 1.928502  | -0.004410 |
| H  | 2.322322  | 3.046080  | 0.767240  |
| H  | 2.563165  | 1.371032  | 1.400777  |

**11. -4975.157506**



|    |           |           |           |
|----|-----------|-----------|-----------|
| C  | 1.854514  | -2.702563 | -0.951792 |
| N  | 1.852147  | -1.643067 | -0.403731 |
| Fe | 1.872500  | -4.381913 | -1.835608 |
| C  | 0.355871  | -4.900719 | -0.824744 |
| N  | -0.536661 | -5.275156 | -0.122002 |
| C  | 0.941517  | -3.764877 | -3.131712 |
| O  | 0.300134  | -3.325339 | -4.034238 |
| O  | 3.204666  | -5.158974 | -0.421196 |
| O  | 2.576219  | -5.809845 | 0.797080  |
| Ni | 4.037932  | -6.585171 | -1.378755 |
| S  | 4.961520  | -8.462045 | -2.227778 |
| C  | 5.389261  | -7.941758 | -3.947593 |
| S  | 2.252948  | -6.567199 | -2.678900 |
| C  | 1.190613  | -7.794137 | -1.798489 |
| S  | 3.900796  | -3.896066 | -2.953771 |
| C  | 4.156542  | -2.065580 | -2.966847 |
| S  | 5.976489  | -6.239805 | -0.329895 |
| C  | 5.709954  | -4.916441 | 0.935059  |
| H  | 1.619562  | -5.586740 | 0.613556  |
| H  | 5.158452  | -1.859725 | -3.391287 |
| H  | 3.395469  | -1.567455 | -3.594421 |
| H  | 4.083426  | -1.645234 | -1.951457 |
| H  | 4.816550  | -5.138246 | 1.534958  |
| H  | 6.617224  | -4.798879 | 1.553832  |
| H  | 5.505381  | -4.002109 | 0.359908  |
| H  | 4.486323  | -7.578920 | -4.466908 |
| H  | 6.138119  | -7.131351 | -3.944838 |
| H  | 5.801815  | -8.812346 | -4.492949 |
| H  | 0.155120  | -7.691706 | -2.164229 |
| H  | 1.586874  | -8.801451 | -2.012757 |
| H  | 1.199184  | -7.602972 | -0.714979 |
| H  | 6.001585  | -7.292676 | 0.544275  |

**12. -4975.152496 (-66.89i)**

|    |          |          |          |
|----|----------|----------|----------|
| C  | 3.087796 | 7.526967 | 4.225447 |
| Fe | 3.320882 | 5.739309 | 3.615793 |
| S  | 5.390769 | 6.197605 | 2.549905 |
| C  | 6.108896 | 7.659977 | 3.418261 |
| N  | 2.948438 | 8.657033 | 4.580197 |
| C  | 1.835607 | 5.176718 | 4.642755 |
| N  | 0.954518 | 4.794574 | 5.354519 |
| C  | 2.344929 | 6.067171 | 2.239629 |
| O  | 1.664731 | 6.301298 | 1.290754 |
| O  | 4.679320 | 5.372556 | 5.132152 |
| O  | 4.122378 | 4.763237 | 6.403465 |
| Ni | 5.890628 | 4.161380 | 3.845357 |
| S  | 7.708782 | 4.916302 | 4.882461 |

|   |          |          |          |
|---|----------|----------|----------|
| C | 7.328684 | 4.495454 | 6.643171 |
| S | 3.959674 | 3.560984 | 2.972411 |
| C | 3.347910 | 2.384981 | 4.250736 |
| S | 6.866531 | 2.134875 | 3.511013 |
| C | 7.146878 | 2.160930 | 1.681141 |
| H | 3.152512 | 4.913955 | 6.239689 |
| H | 7.168718 | 7.767048 | 3.121622 |
| H | 5.541422 | 8.563642 | 3.143842 |
| H | 6.033301 | 7.521191 | 4.506873 |
| H | 6.429072 | 5.074426 | 6.900075 |
| H | 7.085973 | 3.424118 | 6.710502 |
| H | 8.179033 | 4.757750 | 7.297533 |
| H | 6.182515 | 2.295413 | 1.161336 |
| H | 7.817819 | 2.987456 | 1.384706 |
| H | 7.598768 | 1.200288 | 1.362973 |
| H | 2.253610 | 2.295895 | 4.145327 |
| H | 3.851151 | 1.416564 | 4.090921 |
| H | 3.582693 | 2.783413 | 5.250981 |
| H | 8.469305 | 3.793088 | 4.620171 |

**13. -4975.154844**

|    |           |           |           |
|----|-----------|-----------|-----------|
| C  | 1.311780  | -2.464715 | -1.376482 |
| N  | 1.203794  | -1.313005 | -1.085372 |
| Fe | 1.519294  | -4.266682 | -1.939385 |
| C  | -0.044649 | -4.798055 | -1.019926 |
| N  | -0.995926 | -5.154871 | -0.391153 |
| C  | 0.619000  | -3.919372 | -3.377140 |
| O  | -0.014596 | -3.659099 | -4.351395 |
| O  | 2.672879  | -4.713746 | -0.344112 |
| O  | 2.063961  | -4.520837 | 1.024190  |
| Ni | 4.219287  | -5.955364 | -2.178006 |
| S  | 4.918865  | -8.143700 | -2.018475 |
| C  | 5.534211  | -8.246011 | -3.757839 |
| S  | 2.113143  | -6.458597 | -2.680884 |
| C  | 1.629740  | -7.527462 | -1.263584 |
| S  | 3.639026  | -3.920795 | -2.924124 |
| C  | 4.413486  | -2.624747 | -1.867744 |
| S  | 6.200127  | -5.340104 | -1.271424 |
| C  | 5.593377  | -5.430633 | 0.478944  |
| H  | 1.106209  | -4.593677 | 0.783093  |
| H  | 5.508063  | -2.604604 | -2.016147 |
| H  | 3.966812  | -1.658464 | -2.152665 |
| H  | 4.142202  | -2.836026 | -0.820576 |
| H  | 4.631021  | -4.883938 | 0.504340  |
| H  | 5.395827  | -6.487244 | 0.718697  |
| H  | 6.346802  | -5.003299 | 1.162772  |
| H  | 4.689066  | -8.137719 | -4.459113 |
| H  | 6.267545  | -7.447608 | -3.978953 |
| H  | 6.017808  | -9.228489 | -3.923633 |

|   |          |           |           |
|---|----------|-----------|-----------|
| H | 0.535061 | -7.652784 | -1.304809 |
| H | 2.152666 | -8.494940 | -1.339783 |
| H | 1.900924 | -6.991727 | -0.339622 |
| H | 6.583469 | -6.682845 | -1.349772 |

**14. -4976.311771**

|    |           |            |           |
|----|-----------|------------|-----------|
| C  | 2.197076  | -3.145239  | -1.760234 |
| N  | 1.928160  | -2.010417  | -1.511506 |
| Fe | 2.528041  | -4.989998  | -2.083427 |
| S  | 2.575093  | -7.319358  | -2.555148 |
| Ni | 0.483781  | -7.454346  | -3.290305 |
| S  | 0.757587  | -9.518843  | -4.266144 |
| C  | 0.893977  | -10.560236 | -2.746517 |
| S  | 0.190258  | -5.517130  | -2.202858 |
| C  | -0.397346 | -4.299205  | -3.458031 |
| C  | 4.399791  | -4.738561  | -2.151505 |
| N  | 5.578238  | -4.572163  | -2.253500 |
| C  | 2.583921  | -5.268462  | -0.367155 |
| O  | 2.642685  | -5.421403  | 0.811475  |
| O  | 2.436986  | -4.751459  | -4.045610 |
| O  | 3.263277  | -3.660314  | -4.633440 |
| C  | 3.650501  | -7.448958  | -4.039948 |
| S  | -1.665593 | -7.884513  | -3.845230 |
| C  | -2.933924 | -6.801527  | -2.997955 |
| H  | 4.013139  | -3.657976  | -3.985678 |
| H  | -1.343778 | -4.625176  | -3.925345 |
| H  | -0.533277 | -3.338949  | -2.933702 |
| H  | 0.416581  | -4.191318  | -4.197747 |
| H  | -3.840206 | -7.389247  | -2.771332 |
| H  | -2.496485 | -6.363146  | -2.086045 |
| H  | -3.194614 | -5.991276  | -3.695720 |
| H  | 1.710206  | -10.184619 | -2.105675 |
| H  | -0.041345 | -10.555976 | -2.153135 |
| H  | 1.111637  | -11.604108 | -3.042601 |
| H  | 4.694204  | -7.423309  | -3.683626 |
| H  | 3.425324  | -8.385500  | -4.574745 |
| H  | 3.452857  | -6.550332  | -4.651155 |
| H  | -1.794933 | -8.899847  | -2.944846 |
| H  | 1.360478  | -5.690994  | -5.939267 |
| H  | 1.031245  | -5.914420  | -6.583757 |

**15. -4976.297442 (508.23i)**

|    |           |           |            |
|----|-----------|-----------|------------|
| C  | 31.258256 | 42.182202 | 114.283091 |
| S  | 31.168974 | 43.232501 | 112.761831 |
| Ni | 29.260966 | 44.509247 | 112.994397 |
| S  | 30.087532 | 45.537393 | 114.762089 |
| Fe | 28.155612 | 46.815679 | 115.102560 |

|   |           |           |            |
|---|-----------|-----------|------------|
| O | 28.248074 | 47.518735 | 113.164537 |
| O | 28.970202 | 48.801072 | 112.906949 |
| S | 27.205446 | 44.849040 | 114.111649 |
| C | 25.997754 | 45.493847 | 112.868890 |
| S | 28.294973 | 43.475873 | 111.297978 |
| C | 28.008485 | 41.733998 | 111.866637 |
| C | 31.406664 | 46.628211 | 114.074275 |
| C | 27.948075 | 46.195493 | 116.696962 |
| O | 27.794321 | 45.798972 | 117.805987 |
| C | 26.470374 | 47.701011 | 115.257356 |
| N | 25.391835 | 48.198657 | 115.357347 |
| C | 29.093048 | 48.323628 | 115.750127 |
| N | 29.717572 | 49.287187 | 116.080869 |
| H | 30.415023 | 41.468974 | 114.350558 |
| H | 31.238432 | 42.824658 | 115.180398 |
| H | 31.832588 | 47.209466 | 114.909714 |
| H | 30.971688 | 47.314372 | 113.331709 |
| H | 27.269871 | 41.802096 | 112.679781 |
| H | 28.967279 | 41.359029 | 112.261136 |
| H | 26.515726 | 46.136917 | 112.139106 |
| H | 25.251950 | 46.099369 | 113.408839 |
| H | 32.165166 | 45.976828 | 113.609357 |
| H | 32.205220 | 41.606767 | 114.276687 |
| H | 27.625352 | 41.094803 | 111.049888 |
| H | 25.509149 | 44.647066 | 112.352995 |
| H | 29.168359 | 49.061535 | 113.847412 |
| H | 28.864416 | 46.652617 | 112.481529 |
| H | 29.294390 | 45.911396 | 111.939613 |
| H | 29.409368 | 43.143145 | 110.569954 |

**16. -4976.309520**

|    |           |           |            |
|----|-----------|-----------|------------|
| C  | 30.567958 | 42.260634 | 115.274441 |
| S  | 30.924594 | 42.331774 | 113.466069 |
| Ni | 30.316914 | 44.337001 | 112.613257 |
| S  | 29.981108 | 43.410076 | 110.664742 |
| C  | 28.130211 | 43.485490 | 110.553745 |
| S  | 30.448144 | 45.559556 | 114.456064 |
| C  | 31.606216 | 46.913244 | 113.961521 |
| S  | 27.412249 | 44.473583 | 114.141235 |
| C  | 25.569748 | 44.546658 | 114.272185 |
| Fe | 28.293332 | 46.529608 | 114.843682 |
| C  | 29.056683 | 48.238078 | 115.154117 |
| N  | 29.523561 | 49.335621 | 115.235212 |
| O  | 28.109851 | 46.930790 | 112.749725 |
| O  | 28.650038 | 48.264638 | 112.261558 |
| C  | 28.307279 | 46.070870 | 116.487129 |
| O  | 28.290798 | 45.754048 | 117.631722 |
| C  | 26.586697 | 47.324779 | 115.101710 |
| N  | 25.517498 | 47.819295 | 115.282322 |

|   |           |           |            |
|---|-----------|-----------|------------|
| H | 29.486966 | 42.378320 | 115.457139 |
| H | 31.099374 | 43.067583 | 115.806213 |
| H | 31.752931 | 47.578234 | 114.827436 |
| H | 31.195507 | 47.496372 | 113.123738 |
| H | 27.879799 | 44.510186 | 110.242383 |
| H | 27.704161 | 43.312302 | 111.556760 |
| H | 25.153481 | 45.344638 | 113.636724 |
| H | 25.256421 | 44.747008 | 115.310238 |
| H | 32.560613 | 46.447556 | 113.661912 |
| H | 30.905781 | 41.282161 | 115.665377 |
| H | 27.768997 | 42.758013 | 109.805206 |
| H | 25.167523 | 43.565726 | 113.952590 |
| H | 28.854219 | 48.670310 | 113.153104 |
| H | 28.841000 | 46.304961 | 112.407579 |
| H | 30.111227 | 45.643831 | 111.882816 |
| H | 30.022709 | 42.079488 | 111.035018 |

**17. -4975.772191**

|    |           |           |            |
|----|-----------|-----------|------------|
| C  | 31.637054 | 42.559410 | 114.016811 |
| S  | 31.036495 | 43.552547 | 112.580026 |
| Ni | 29.014329 | 44.314787 | 113.168975 |
| S  | 29.685680 | 45.280406 | 115.057450 |
| Fe | 27.989396 | 46.871564 | 114.888019 |
| C  | 26.511236 | 48.006195 | 114.538886 |
| N  | 25.551628 | 48.667998 | 114.304211 |
| S  | 28.149724 | 43.381032 | 111.332515 |
| C  | 27.638679 | 41.753974 | 112.042013 |
| C  | 31.305729 | 46.132970 | 114.817035 |
| S  | 26.990142 | 44.996385 | 113.920364 |
| C  | 25.919125 | 45.603134 | 112.541602 |
| C  | 29.035858 | 48.321313 | 115.465221 |
| N  | 29.754635 | 49.251796 | 115.664564 |
| O  | 28.676476 | 47.299002 | 112.848177 |
| O  | 29.440955 | 48.554088 | 112.611421 |
| C  | 27.375380 | 46.599982 | 116.463681 |
| O  | 26.948423 | 46.432761 | 117.551168 |
| H  | 31.049967 | 41.635656 | 114.149093 |
| H  | 31.588104 | 43.139158 | 114.953064 |
| H  | 31.529607 | 46.651120 | 115.762796 |
| H  | 31.253225 | 46.882907 | 114.014147 |
| H  | 26.809506 | 41.960304 | 112.734289 |
| H  | 28.484112 | 41.322472 | 112.598534 |
| H  | 26.480782 | 46.285346 | 111.888013 |
| H  | 25.094033 | 46.164055 | 113.006136 |
| H  | 32.081128 | 45.389704 | 114.578533 |
| H  | 32.687927 | 42.284606 | 113.818809 |
| H  | 27.306483 | 41.079559 | 111.236693 |
| H  | 25.526478 | 44.746868 | 111.967714 |
| H  | 29.473213 | 48.905412 | 113.553181 |

|   |           |           |            |
|---|-----------|-----------|------------|
| H | 29.375947 | 46.602073 | 112.692905 |
| H | 29.348815 | 42.920015 | 110.833612 |

**18. -4975.159964**

|    |           |           |            |
|----|-----------|-----------|------------|
| C  | 30.878518 | 42.298127 | 113.819267 |
| S  | 31.225262 | 43.602411 | 112.557502 |
| Ni | 29.582912 | 45.080099 | 112.893576 |
| S  | 30.314134 | 45.805661 | 114.857639 |
| C  | 31.468503 | 47.143928 | 114.324067 |
| S  | 27.411679 | 44.481441 | 114.787160 |
| Fe | 28.169104 | 46.742825 | 115.030206 |
| C  | 27.933048 | 46.586544 | 116.720673 |
| O  | 27.751812 | 46.475467 | 117.891323 |
| S  | 28.325858 | 44.289605 | 111.241364 |
| C  | 29.174148 | 44.934978 | 109.724985 |
| O  | 28.632808 | 46.785548 | 112.992623 |
| O  | 27.450446 | 47.014391 | 112.072823 |
| C  | 25.636512 | 44.384267 | 115.308299 |
| C  | 26.432888 | 47.418246 | 114.739379 |
| N  | 25.351031 | 47.806661 | 114.409371 |
| C  | 28.838600 | 48.521825 | 115.228678 |
| N  | 29.268947 | 49.620964 | 115.399285 |
| H  | 29.875945 | 41.861501 | 113.673010 |
| H  | 30.925656 | 42.726091 | 114.834775 |
| H  | 31.686251 | 47.787915 | 115.191524 |
| H  | 30.987965 | 47.756459 | 113.547205 |
| H  | 29.348847 | 46.015742 | 109.836273 |
| H  | 28.573961 | 44.730698 | 108.820376 |
| H  | 25.019980 | 45.126278 | 114.774784 |
| H  | 25.533570 | 44.565835 | 116.394012 |
| H  | 32.388411 | 46.668646 | 113.941442 |
| H  | 31.639611 | 41.499402 | 113.723035 |
| H  | 30.139248 | 44.407331 | 109.665156 |
| H  | 25.264996 | 43.365692 | 115.085899 |
| H  | 26.739500 | 47.161982 | 112.763259 |
| H  | 27.475633 | 45.394932 | 111.407871 |

**19. -4975.160946 (592.22 i)**

|    |           |           |            |
|----|-----------|-----------|------------|
| C  | 30.893128 | 42.296979 | 113.762663 |
| S  | 31.235790 | 43.629672 | 112.531047 |
| Ni | 29.556443 | 45.058395 | 112.849789 |
| O  | 28.618953 | 46.703307 | 112.993730 |
| O  | 27.353449 | 46.918055 | 111.963584 |
| S  | 30.247859 | 45.758551 | 114.847300 |
| Fe | 28.112038 | 46.752282 | 114.959657 |
| C  | 28.797594 | 48.535649 | 115.078930 |
| N  | 29.240693 | 49.635880 | 115.200660 |
| S  | 28.300705 | 44.365872 | 111.111857 |

|   |           |           |            |
|---|-----------|-----------|------------|
| C | 29.250885 | 45.060040 | 109.684187 |
| C | 31.467341 | 47.059064 | 114.366923 |
| S | 27.337162 | 44.499120 | 114.824436 |
| C | 25.611832 | 44.408086 | 115.489910 |
| C | 27.893232 | 46.681593 | 116.665007 |
| O | 27.731643 | 46.625284 | 117.840973 |
| C | 26.373082 | 47.412971 | 114.655086 |
| N | 25.284023 | 47.778702 | 114.324157 |
| H | 29.928972 | 41.802695 | 113.554185 |
| H | 30.857719 | 42.715934 | 114.782165 |
| H | 31.700700 | 47.667865 | 115.255731 |
| H | 31.029708 | 47.713962 | 113.600119 |
| H | 29.434008 | 46.134343 | 109.843027 |
| H | 28.696298 | 44.908311 | 108.740557 |
| H | 24.964591 | 45.168181 | 115.021662 |
| H | 25.597458 | 44.560767 | 116.585126 |
| H | 32.370658 | 46.551437 | 113.987152 |
| H | 31.704144 | 41.545281 | 113.704902 |
| H | 30.214858 | 44.527325 | 109.639151 |
| H | 25.211429 | 43.399473 | 115.273040 |
| H | 26.639750 | 46.965803 | 112.666978 |
| H | 27.522877 | 45.643004 | 111.448024 |

**20. -4975.235143**

|    |          |          |          |
|----|----------|----------|----------|
| C  | 8.112775 | 1.503476 | 5.442062 |
| S  | 7.766932 | 2.633391 | 4.021644 |
| Ni | 6.067818 | 3.976668 | 4.535765 |
| S  | 5.573546 | 3.848163 | 2.334115 |
| C  | 4.760483 | 5.454823 | 1.951057 |
| O  | 4.733499 | 5.116436 | 4.822879 |
| O  | 3.094388 | 2.178974 | 4.195865 |
| Fe | 4.445367 | 5.560453 | 6.521478 |
| C  | 5.525989 | 7.136823 | 6.514068 |
| N  | 6.208343 | 8.109996 | 6.557092 |
| S  | 6.330641 | 4.069539 | 6.786738 |
| C  | 7.892778 | 5.035761 | 6.960158 |
| C  | 4.181480 | 6.013701 | 8.259149 |
| O  | 4.034228 | 6.342936 | 9.380200 |
| S  | 3.217265 | 3.749687 | 7.333351 |
| C  | 1.428677 | 4.182214 | 7.255268 |
| C  | 2.936580 | 6.598885 | 5.991302 |
| N  | 1.985455 | 7.241147 | 5.678464 |
| H  | 7.607310 | 0.532789 | 5.288835 |
| H  | 7.748879 | 1.935257 | 6.391124 |
| H  | 8.047985 | 5.273142 | 8.027375 |
| H  | 7.831993 | 5.975829 | 6.392667 |
| H  | 4.341939 | 5.866754 | 2.887221 |
| H  | 3.941982 | 5.286818 | 1.227413 |
| H  | 1.136064 | 4.481096 | 6.238160 |

|   |          |          |          |
|---|----------|----------|----------|
| H | 1.192052 | 5.008079 | 7.946316 |
| H | 8.725573 | 4.419321 | 6.582281 |
| H | 9.202383 | 1.325822 | 5.514333 |
| H | 5.483517 | 6.172160 | 1.522877 |
| H | 0.865876 | 3.281100 | 7.562371 |
| H | 3.217024 | 2.654488 | 5.054233 |
| H | 3.741905 | 2.643702 | 3.606821 |

**21. -4898.657562**

|    |           |           |            |
|----|-----------|-----------|------------|
| C  | 30.837726 | 42.158827 | 114.800107 |
| S  | 30.679869 | 42.722133 | 113.049991 |
| Ni | 29.400306 | 44.708379 | 113.228695 |
| S  | 28.851299 | 44.296310 | 111.004915 |
| C  | 28.052377 | 45.862315 | 110.457283 |
| O  | 28.562026 | 46.358206 | 113.210255 |
| Fe | 28.415183 | 46.657957 | 115.112473 |
| C  | 29.035021 | 48.451730 | 115.033615 |
| N  | 29.441684 | 49.577431 | 115.022991 |
| S  | 30.669021 | 45.724996 | 114.909857 |
| C  | 31.539051 | 46.937710 | 113.830738 |
| S  | 27.824743 | 44.251229 | 114.959210 |
| C  | 26.299688 | 44.238910 | 113.928766 |
| C  | 28.375449 | 46.699999 | 116.847921 |
| O  | 28.359586 | 46.703309 | 118.049359 |
| C  | 26.608604 | 47.243416 | 115.012043 |
| N  | 25.468033 | 47.604745 | 114.988434 |
| H  | 29.840468 | 41.976150 | 115.243114 |
| H  | 31.341011 | 42.930368 | 115.413702 |
| H  | 31.933391 | 47.770884 | 114.440110 |
| H  | 30.790737 | 47.327628 | 113.120711 |
| H  | 27.960007 | 46.492010 | 111.373807 |
| H  | 27.047044 | 45.673915 | 110.027202 |
| H  | 26.375065 | 45.075863 | 113.217863 |
| H  | 25.410671 | 44.382731 | 114.570011 |
| H  | 32.356474 | 46.425016 | 113.289360 |
| H  | 31.430109 | 41.219059 | 114.845768 |
| H  | 28.668553 | 46.392179 | 109.701090 |
| H  | 26.237443 | 43.283700 | 113.376099 |

**22. -4899.823370**

|    |           |           |            |
|----|-----------|-----------|------------|
| C  | 30.793752 | 42.202155 | 115.110021 |
| S  | 30.764329 | 42.807806 | 113.367288 |
| Ni | 29.446087 | 44.765041 | 113.483056 |
| S  | 27.713869 | 44.233035 | 115.029686 |
| C  | 26.298650 | 44.247706 | 113.852534 |
| S  | 29.067635 | 44.382907 | 111.204284 |
| C  | 28.302572 | 45.953977 | 110.623310 |
| O  | 28.585964 | 46.400314 | 113.430065 |



|    |           |           |            |
|----|-----------|-----------|------------|
| Fe | 28.258525 | 46.641087 | 115.318289 |
| C  | 26.459474 | 47.206443 | 115.073087 |
| N  | 25.320226 | 47.553214 | 114.956598 |
| S  | 30.529838 | 45.744607 | 115.298695 |
| C  | 31.493083 | 46.998296 | 114.354039 |
| C  | 28.854620 | 48.443833 | 115.352765 |
| N  | 29.242984 | 49.574218 | 115.413845 |
| C  | 28.059047 | 46.627890 | 117.042828 |
| O  | 27.933458 | 46.594430 | 118.236925 |
| H  | 29.769347 | 41.983620 | 115.466757 |
| H  | 31.227320 | 42.967791 | 115.781393 |
| H  | 31.817068 | 47.810689 | 115.029248 |
| H  | 30.821937 | 47.412716 | 113.583916 |
| H  | 28.114791 | 46.558490 | 111.541189 |
| H  | 27.346334 | 45.762065 | 110.095137 |
| H  | 26.427276 | 45.120767 | 113.194740 |
| H  | 25.347959 | 44.345061 | 114.408209 |
| H  | 32.365566 | 46.507955 | 113.882756 |
| H  | 31.403807 | 41.275473 | 115.178940 |
| H  | 28.979388 | 46.510959 | 109.943025 |
| H  | 26.311465 | 43.321143 | 113.250423 |
| H  | 31.341884 | 44.674118 | 108.634751 |
| H  | 30.914899 | 44.571437 | 109.264701 |

**23. -4899.793374 (553.83i)**

|    |          |          |          |
|----|----------|----------|----------|
| C  | 7.801418 | 2.322870 | 5.487536 |
| S  | 6.344272 | 2.169422 | 4.339881 |
| Ni | 4.566855 | 3.440350 | 5.024236 |
| S  | 2.680610 | 4.276752 | 6.017409 |
| C  | 1.642139 | 5.024643 | 4.697416 |
| S  | 3.366097 | 2.165246 | 3.513525 |
| C  | 3.051080 | 0.691215 | 4.579683 |
| O  | 4.031205 | 6.955320 | 5.295022 |
| Fe | 3.736664 | 6.273002 | 6.973183 |
| C  | 2.144503 | 7.295625 | 7.101193 |
| N  | 1.121780 | 7.908366 | 7.197025 |
| S  | 5.626227 | 4.654696 | 6.617967 |
| C  | 6.801302 | 5.716803 | 5.677951 |
| C  | 4.820012 | 7.658835 | 7.711784 |
| N  | 5.520157 | 8.497126 | 8.198455 |
| C  | 3.479570 | 5.620119 | 8.600370 |
| O  | 3.303897 | 5.205122 | 9.708124 |
| H  | 7.475656 | 2.743278 | 6.457023 |
| H  | 8.594712 | 2.985601 | 5.083360 |
| H  | 7.521397 | 6.157626 | 6.391146 |
| H  | 6.190142 | 6.521731 | 5.220721 |
| H  | 2.465304 | 0.976422 | 5.473857 |
| H  | 4.015231 | 0.259432 | 4.908561 |
| H  | 2.173168 | 5.927964 | 4.341729 |

|   |          |           |          |
|---|----------|-----------|----------|
| H | 0.682481 | 5.329813  | 5.151194 |
| H | 7.318320 | 5.113548  | 4.912662 |
| H | 8.249234 | 1.321307  | 5.660157 |
| H | 2.482306 | -0.076065 | 4.010903 |
| H | 1.496365 | 4.279027  | 3.896338 |
| H | 4.522769 | 5.152504  | 3.858070 |
| H | 4.364147 | 5.858040  | 4.284498 |

**24. -4899.838042**

|    |          |          |          |
|----|----------|----------|----------|
| C  | 6.752755 | 2.009112 | 7.000863 |
| S  | 6.091075 | 1.716549 | 5.302061 |
| Ni | 4.942240 | 3.616966 | 4.605170 |
| S  | 6.111056 | 5.178985 | 5.802641 |
| C  | 6.583938 | 6.575055 | 4.690162 |
| S  | 3.189430 | 4.035722 | 6.243368 |
| Fe | 4.170345 | 6.079207 | 6.992444 |
| C  | 4.668676 | 5.367504 | 8.489924 |
| O  | 5.004232 | 4.913091 | 9.546100 |
| S  | 3.946435 | 2.574586 | 2.793819 |
| C  | 3.259706 | 0.992914 | 3.473090 |
| C  | 1.702160 | 4.541009 | 5.276892 |
| O  | 3.604470 | 6.959899 | 5.289875 |
| C  | 2.567024 | 6.721969 | 7.795963 |
| N  | 1.558542 | 7.092792 | 8.320142 |
| C  | 5.080571 | 7.699047 | 7.450022 |
| N  | 5.686570 | 8.685432 | 7.749051 |
| H  | 7.228001 | 3.005138 | 7.064270 |
| H  | 7.505925 | 1.234260 | 7.256279 |
| H  | 7.309108 | 7.211130 | 5.228970 |
| H  | 5.665527 | 7.161953 | 4.490403 |
| H  | 2.398248 | 1.196449 | 4.137072 |
| H  | 4.024471 | 0.458357 | 4.062888 |
| H  | 1.789107 | 5.625614 | 5.072844 |
| H  | 0.795842 | 4.347556 | 5.880964 |
| H  | 7.032336 | 6.180100 | 3.760720 |
| H  | 5.946358 | 1.975306 | 7.756120 |
| H  | 2.915768 | 0.349731 | 2.634732 |
| H  | 1.677399 | 3.961649 | 4.336526 |
| H  | 4.496890 | 4.799360 | 3.837751 |
| H  | 3.768011 | 6.212736 | 4.662908 |

**25. -4900.008849**

|    |           |          |           |
|----|-----------|----------|-----------|
| C  | -2.940406 | 0.483354 | -0.944054 |
| S  | -1.482115 | 0.617084 | -2.068731 |
| Ni | 0.344172  | 1.098899 | -0.947076 |
| O  | 1.869754  | 2.090536 | -0.133245 |
| Fe | 3.201505  | 1.306528 | -1.530467 |
| C  | 4.252532  | 0.634866 | -2.733970 |

|   |           |           |           |
|---|-----------|-----------|-----------|
| O | 4.978402  | 0.192490  | -3.551509 |
| S | -0.462981 | 1.052112  | 1.163451  |
| C | -0.786581 | -0.683774 | 1.694586  |
| S | 1.331842  | 1.457976  | -2.912272 |
| C | 0.915701  | 3.212744  | -3.268498 |
| S | 2.153949  | -0.671321 | -0.886241 |
| C | 2.685791  | -0.940443 | 0.851588  |
| C | 4.563143  | 1.165499  | -0.222514 |
| N | 5.399499  | 1.046882  | 0.615012  |
| C | 3.756689  | 3.077357  | -1.912116 |
| N | 3.992120  | 4.225029  | -2.122039 |
| H | -0.549207 | -0.791992 | 2.763786  |
| H | -0.191525 | -1.376090 | 1.083618  |
| H | -1.857653 | -0.874896 | 1.538415  |
| H | -2.989408 | 1.306001  | -0.210029 |
| H | -2.969944 | -0.485089 | -0.414586 |
| H | -3.841462 | 0.543697  | -1.579813 |
| H | -0.157613 | 3.267998  | -3.510068 |
| H | 1.524645  | 3.526204  | -4.132060 |
| H | 1.167047  | 3.870334  | -2.423854 |
| H | 2.081867  | -1.743190 | 1.309519  |
| H | 2.617455  | -0.006568 | 1.432490  |
| H | 3.748998  | -1.228711 | 0.847109  |
| H | 1.871922  | 3.044952  | -0.372995 |
| H | 0.798117  | 1.182812  | 1.668774  |

**26. -4900.009370 (546.13i)**

|    |           |           |           |
|----|-----------|-----------|-----------|
| C  | -2.809355 | 0.053152  | -1.069451 |
| S  | -1.502883 | 0.623788  | -2.235743 |
| Ni | 0.261335  | 1.124103  | -1.081699 |
| S  | -0.593172 | 1.365747  | 1.065745  |
| C  | -0.602651 | -0.219610 | 2.006102  |
| S  | 1.337973  | 1.610495  | -2.978501 |
| Fe | 3.125369  | 1.286332  | -1.528283 |
| C  | 4.442221  | 0.972264  | -0.205557 |
| N  | 5.250427  | 0.740050  | 0.635625  |
| S  | 1.949197  | -0.672137 | -1.052951 |
| C  | 2.481742  | -1.188660 | 0.629279  |
| O  | 1.807353  | 2.092539  | -0.087728 |
| C  | 0.970622  | 3.403947  | -3.157203 |
| C  | 3.783454  | 3.045606  | -1.778520 |
| N  | 4.076151  | 4.192302  | -1.904830 |
| C  | 4.173119  | 0.625917  | -2.731800 |
| O  | 4.905084  | 0.185413  | -3.544136 |
| H  | -0.187555 | -0.055950 | 3.012706  |
| H  | -0.023356 | -0.987200 | 1.477743  |
| H  | -1.650963 | -0.544549 | 2.094039  |
| H  | -3.081843 | 0.830509  | -0.336133 |
| H  | -2.494929 | -0.859678 | -0.536576 |

|   |           |           |           |
|---|-----------|-----------|-----------|
| H | -3.699774 | -0.191169 | -1.676037 |
| H | -0.033808 | 3.510367  | -3.596645 |
| H | 1.737965  | 3.835853  | -3.819482 |
| H | 1.024748  | 3.927746  | -2.191960 |
| H | 1.893153  | -2.068083 | 0.943524  |
| H | 2.380268  | -0.365522 | 1.352357  |
| H | 3.551530  | -1.447037 | 0.584758  |
| H | 1.895165  | 3.064130  | -0.224012 |
| H | 0.830420  | 1.757618  | 1.022379  |

**27. -4900.045782**

|    |           |           |           |
|----|-----------|-----------|-----------|
| C  | -2.775878 | -0.401433 | -1.134555 |
| S  | -1.744584 | 0.973456  | -1.800690 |
| Ni | 0.241812  | 0.450499  | -1.133452 |
| O  | 2.443390  | 2.063300  | 0.205589  |
| Fe | 3.199597  | 1.212363  | -1.629481 |
| C  | 3.947603  | 0.615114  | -3.062497 |
| O  | 4.479927  | 0.215263  | -4.032553 |
| S  | 0.000849  | 0.147543  | 1.030124  |
| C  | -1.093064 | 1.520233  | 1.604838  |
| S  | 1.245570  | 1.722718  | -2.735395 |
| C  | 0.774235  | 3.420622  | -2.197616 |
| S  | 2.080065  | -0.823697 | -1.302196 |
| C  | 2.643818  | -1.638260 | 0.244675  |
| C  | 4.688100  | 0.705656  | -0.557629 |
| N  | 5.542800  | 0.392866  | 0.208712  |
| C  | 3.968507  | 2.925053  | -1.920135 |
| N  | 4.427676  | 4.009403  | -2.080548 |
| H  | -2.122093 | 1.393808  | 1.231880  |
| H  | -0.714115 | 2.495751  | 1.265036  |
| H  | -1.101293 | 1.498388  | 2.708723  |
| H  | -2.753486 | -0.427021 | -0.032795 |
| H  | -2.414928 | -1.371155 | -1.512563 |
| H  | -3.813341 | -0.246163 | -1.479834 |
| H  | -0.293904 | 3.580065  | -2.415885 |
| H  | 1.397010  | 4.123332  | -2.774119 |
| H  | 0.985434  | 3.554084  | -1.126898 |
| H  | 2.151064  | -2.621103 | 0.318307  |
| H  | 2.392262  | -1.036309 | 1.133134  |
| H  | 3.737891  | -1.748298 | 0.188114  |
| H  | 3.284213  | 2.064440  | 0.721429  |
| H  | 1.828713  | 1.398573  | 0.650283  |

**28. -4900.036144**

|    |           |           |           |
|----|-----------|-----------|-----------|
| C  | -2.782775 | -0.036001 | -1.280788 |
| S  | -1.752471 | 1.497428  | -1.291903 |
| Ni | 0.254934  | 0.561064  | -0.935667 |
| O  | 2.551977  | 2.166877  | 0.187340  |

|    |           |           |           |
|----|-----------|-----------|-----------|
| Fe | 3.303397  | 1.209271  | -1.688824 |
| C  | 4.024358  | 0.520969  | -3.067452 |
| O  | 4.548379  | 0.046716  | -4.023255 |
| S  | -0.064264 | -0.010927 | 1.188531  |
| C  | -1.355079 | 1.049951  | 1.976806  |
| S  | 1.220945  | 1.562707  | -2.720540 |
| C  | 0.827221  | 3.349347  | -2.483289 |
| S  | 2.083520  | -0.743022 | -1.162435 |
| C  | 2.722814  | -1.512921 | 0.388024  |
| C  | 4.808032  | 0.795262  | -0.602110 |
| N  | 5.683690  | 0.544600  | 0.170547  |
| C  | 4.013261  | 2.912972  | -2.156429 |
| N  | 4.445066  | 3.978764  | -2.470765 |
| H  | -2.371916 | 0.778235  | 1.645432  |
| H  | -1.197899 | 2.113857  | 1.738987  |
| H  | -1.283394 | 0.900192  | 3.071906  |
| H  | -2.743357 | -0.543476 | -0.299816 |
| H  | -2.438284 | -0.750750 | -2.049479 |
| H  | -3.832615 | 0.239721  | -1.504898 |
| H  | -0.254576 | 3.485842  | -2.651499 |
| H  | 1.418587  | 3.928032  | -3.211095 |
| H  | 1.104860  | 3.665621  | -1.467098 |
| H  | 2.316534  | -2.536313 | 0.466593  |
| H  | 2.403133  | -0.938564 | 1.274940  |
| H  | 3.823061  | -1.529746 | 0.335740  |
| H  | 3.347915  | 1.898096  | 0.705521  |
| H  | 1.808798  | 1.565287  | 0.498976  |
